# Supplementary material for: Preliminary Discovery of Small Molecule Inhibitors of Epidermal Growth Factor Receptor (EGFR) That Bind to the Extracellular Domain
Source: MDPI journal article supplement (doi:10.3390/cancers14153647), 2022-07-27
Supplement: s1 [file s1]

## SUPPLEMENTARY MATERIALS

# Preliminary discovery of small molecule inhibitors of Epidermal Growth Factor Receptor (EGFR) that bind to the extracellular domain

Rosa Di Liddo <sup>1</sup>, Marco Verona <sup>1</sup>, Christian Vaccarin <sup>1,2</sup>, Laura Acquasaliente <sup>1</sup>, Sandra Schrenk <sup>1</sup>, Monica Piccione <sup>1</sup>, Carola Cenzi <sup>1</sup>, Michele De Franco <sup>1</sup>, Matteo Dal Prà <sup>1</sup>, Giovanni Ribaudo <sup>3</sup>, Maria Grazia Ferlin <sup>1,†</sup>, Maria Teresa Conconi <sup>1</sup>, Adriana Chilin <sup>1</sup>, Valentina Gandin <sup>1</sup> and Giovanni Marzaro <sup>1,\*</sup>

<sup>1</sup> Department of Pharmaceutical and Pharmacological Sciences, University of Padova, Via Marzolo 5, I-35131 Padova, Italy; rosa.diliddo@unipd.it (R.D.L.); marco.verona@phd.unipd.it (M.V.); christian.vaccarin@phd.unipd.it (C.V.); laura.acquasaliente@unipd.it (L.A.); sandra89.schrenk@gmail.com (S.S.); monica.piccione@studenti.unipd.it (M.P.); carola.cenzi@iov.veneto.it (C.C.); miky\_defra@hotmail.com (M.D.F.); matteo.dal-pra@autifony.com (M.D.P.); mariagrazia.ferlin@unipd.it (M.G.F.); mariateresa.conconi@unipd.it (M.T.C.); adriana.chilin@unipd.it (A.C.); valentina.gandin@unipd.it (V.G.)

<sup>2</sup> Center for Radiopharmaceutical Sciences, ETH-PSI-USZ, Paul Scherrer Institute, 5232 Villigen-PSI, Switzerland

<sup>3</sup> Department of Molecular and Translational Medicine, University of Brescia, Viale Europa 11, I-25123 Brescia, Italy; giovanni.ribaudo@unibs.it

\* Correspondence: Correspondence: giovanni.marzaro@unipd.it; Tel.: +39-049-827-5024

† Retired.

### Experimental details:

|                                                               |         |
|---------------------------------------------------------------|---------|
| 1. Synthesis and characterization of isatin Schiff bases..... | page S2 |
| 2. Surface Plasmonic Resonance (SPR) experiments .....        | page S7 |
| 2.1. EGFR-EGF interaction .....                               | page S7 |
| 2.2. DSF-102 competition experiments.....                     | page S8 |

### Supplementary Table and Figures:

|                                                                                            |          |
|--------------------------------------------------------------------------------------------|----------|
| Figure S1. Binding of EGF to EGFR monitored by surface plasmonic resonance.....            | page S8  |
| Figure S2. Drug likeness properties of DSF-102.....                                        | page S9  |
| Figure S3. HPLC analysis of DSF-102.....                                                   | page S9  |
| Figure S4. <sup>1</sup> H-NMR of DSF-102.....                                              | page S10 |
| Figure S5. <sup>13</sup> C-NMR of DSF-102 .....                                            | page S10 |
| Figure S6. Results from MD studies .....                                                   | page S11 |
| Table S1. List of screened compounds, SMILES code and % of inhibition at 50 and 10 μM..... | page S12 |

|                                  |          |
|----------------------------------|----------|
| Supplementary Bibliography ..... | page S15 |
|----------------------------------|----------|

## 1. Synthesis and characterization of isatin Schiff bases

All solvent and starting materials were purchased from commercial suppliers (Sigma Aldrich and Carlo Erba) and used without further purifications. Thin layer chromatography (TLC) was performed on pre-coated plates of silica gel 60 with fluorescent indicator UV254 (0.2 mm, Merck); column chromatography was done with silica gel 60 (0.063-0.100 mm, Merck). The microwave-assisted synthetic procedures were conducted on a CEM Discover monomode reactor with the temperature monitored by a built-in infrared sensor and the automatic control of the power; all the reactions were performed in closed devices with pressure control. The  $^1\text{H}$ - and  $^{13}\text{C}$ -NMR spectra were recorded at room temperature on a Bruker 300 spectrometer; chemical shifts are reported in ppm and are referred to residual solvent peaks. Coupling constants (J) are given in Hz. The ratio E/Z was determined on the basis of  $^1\text{H}$ -NMR peak areas. The purity of the compounds (higher than 99.5% for all the compounds) was checked by HPLC. HRMS spectra were obtained using a Applied Biosystem Mariner system 5220 with direct injection of the sample.

Compounds were synthesized according to the following general scheme:

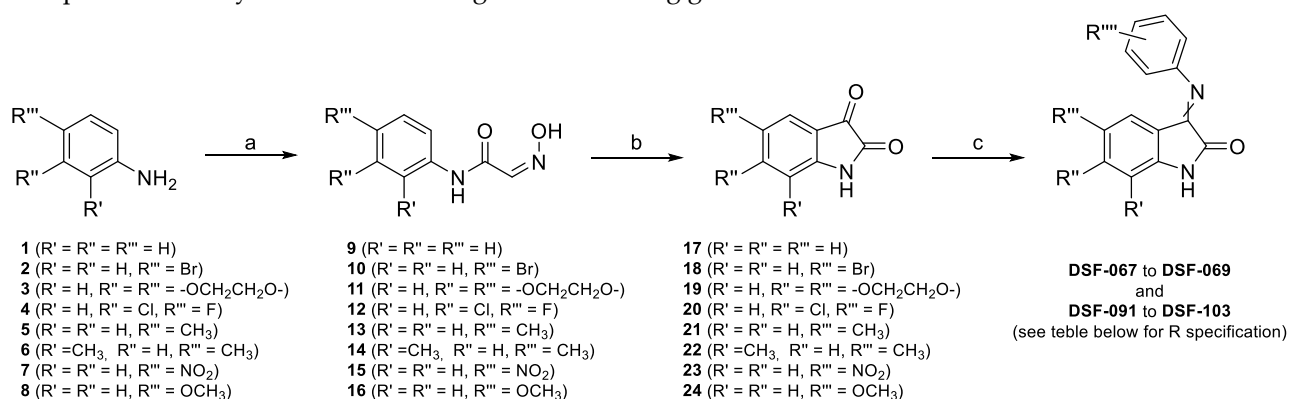

Reaction conditions: a) chloral hydrate,  $\text{NH}_2\text{OH}\cdot\text{HCl}$ ,  $\text{Na}_2\text{SO}_4$ , 1M  $\text{HCl}$ ,  $80^\circ\text{C}$ , 2h; b) conc.  $\text{H}_2\text{SO}_4$ ,  $60^\circ\text{C}$ , 15 min; c) (4-aminophenyl)acetic acid or 3-aminobenzotrifluoride,  $\text{AcOH}$ , ethanol, reflux or MW irradiation.

Compounds **9-24** were synthesized according to literature methods<sup>1,2,3</sup>

Compounds **DSF-067/-069** and **DSF-091/-103** are herein reported in detail.

| ID      | Starting isatin | R' | R''                                  | R'''            | R''''                          |
|---------|-----------------|----|--------------------------------------|-----------------|--------------------------------|
| DSF-067 | 17              | H  | H                                    | H               | <i>p</i> -CH <sub>2</sub> COOH |
| DSF-068 | 18              | H  | H                                    | Br              | <i>p</i> -CH <sub>2</sub> COOH |
| DSF-069 | 17              | H  | H                                    | H               | <i>m</i> -CF <sub>3</sub>      |
| DSF-091 | 19              | H  | -OCH <sub>2</sub> CH <sub>2</sub> O- |                 | <i>p</i> -CH <sub>2</sub> COOH |
| DSF-092 | 20              | H  | Cl                                   | F               | <i>p</i> -CH <sub>2</sub> COOH |
| DSF-093 | 21              | H  | H                                    | Me              | <i>p</i> -CH <sub>2</sub> COOH |
| DSF-094 | 22              | Me | H                                    | Me              | <i>p</i> -CH <sub>2</sub> COOH |
| DSF-095 | 23              | H  | H                                    | NO <sub>2</sub> | <i>p</i> -CH <sub>2</sub> COOH |
| DSF-096 | 24              | H  | H                                    | OMe             | <i>p</i> -CH <sub>2</sub> COOH |
| DSF-097 | 18              | H  | H                                    | Br              | <i>m</i> -CF <sub>3</sub>      |
| DSF-098 | 19              | H  | -OCH <sub>2</sub> CH <sub>2</sub> O- |                 | <i>m</i> -CF <sub>3</sub>      |
| DSF-099 | 20              | H  | Cl                                   | F               | <i>m</i> -CF <sub>3</sub>      |
| DSF-100 | 21              | H  | H                                    | Me              | <i>m</i> -CF <sub>3</sub>      |
| DSF-101 | 22              | Me | H                                    | Me              | <i>m</i> -CF <sub>3</sub>      |
| DSF-102 | 23              | H  | H                                    | NO <sub>2</sub> | <i>m</i> -CF <sub>3</sub>      |
| DSF-103 | 24              | H  | H                                    | OMe             | <i>m</i> -CF <sub>3</sub>      |

*General Procedure for the Synthesis of Isatin Schiff-bases.* In a round-bottomed flask, isatin derivative **17-24** (1.0 mmol) was dissolved in hot absolute ethanol (3 mL), and then an equimolar amount of suitable substituted aniline was added. The mixture is acidified with glacial acetic acid (100  $\mu$ L) and refluxed overnight. The obtained precipitate was filtered, washed with ethanol and re-crystallised from ethanol. In some cases, the reaction was performed under microwave irradiation at 200W, 115  $^{\circ}$ C for 30 minutes, dispersing equimolar amounts of reagents (1 mmol each) in 3 mL of ethanol and adding 100  $\mu$ L of glacial acetic acid.

*(E,Z)-2-(4-(2-oxoindolin-3-ylideneamino)phenyl)acetic acid (DSF-067).* Compound **DSF-067** was prepared by reacting compound **17** with 2-(4-aminophenyl)acetic acid under conventional heating. Yield 34%.

Ratio E/Z: 85:15; mp = 227-229 $^{\circ}$ C; IR (KBr):  $\tilde{\nu}$  ( $\text{cm}^{-1}$ ) = 3244 (NH), 1719 (C=O), 1201 (C=O); HRMS (ESI-TOF) for  $\text{C}_{16}\text{H}_{13}\text{N}_2\text{O}_3$  (M+H) $^{+}$ : calcd = 281.0921, found = 281.1003

Isomer E:  $^1\text{H}$  NMR (300 MHz, DMSO- $d_6$ )  $\delta$  12.34 (broad s, 1H), 10.96 (broad s, 1H), 7.37-7.32 (m, 3H), 6.95-6.92 (m, 2H), 6.90 (dd, J=7.8, J=0.8, 1H), 6.73 (td, J=7.8, J=0.8, 1H), 6.45 (dd, J=7.8, J=0.8, 1H), 3.64 (s, 2H);  $^{13}\text{C}$  NMR (75 MHz, DMSO- $d_6$ )  $\delta$  173.2, 164.0, 155.4, 149.4, 147.4, 134.9, 132.3, 131.0, 125.8, 122.1, 117.8, 116.2, 112.0, 40.6

Isomer Z:  $^1\text{H}$  NMR (300 MHz, DMSO- $d_6$ )  $\delta$  12.34 (broad s, 1H), 10.85 (broad s, 1H), 7.58 (dd, J=7.5, J=0.9, 1H), 7.47 (td, J=7.5, J=0.9, 1H), 7.22-7.18 (m, 2H), 7.06 (td, J=7.5, J=0.9, 1H), 7.00-9.62 (m, 2H), 6.86 (dd, J=7.5, J=0.9, 1H), 3.56 (s, 2H);  $^{13}\text{C}$  NMR (75 MHz, DMSO- $d_6$ )  $\delta$  172.8, 158.9, 153.2, 147.8, 146.0, 134.6, 131.8, 129.7, 123.2, 122.8, 122.0, 119.9, 111.2, 40.6

*(E,Z)-2-(4-(5-bromo-2-oxoindolin-3-ylideneamino)phenyl)acetic acid (DSF-068).* Compound **DSF-068** was prepared by reacting compound **18** with 2-(4-aminophenyl)acetic acid under conventional heating. Yield 31%.

Ratio E/Z: 81:19; mp = 235-237 $^{\circ}$ C; IR (KBr):  $\tilde{\nu}$  ( $\text{cm}^{-1}$ ) = 3231 (NH), 1726 (C=O), 1232 (C=O); HRMS (ESI-TOF) for  $\text{C}_{16}\text{H}_{12}\text{BrN}_2\text{O}_3$  (M+H) $^{+}$ : calcd = 359.0026, found = 359.0018

Isomer E:  $^1\text{H}$  NMR (300 MHz, DMSO- $d_6$ )  $\delta$  12.35 (broad s, 1H), 11.12 (broad s, 1H), 7.53 (dd, J=8.4, J=2.0, 1H), 7.40-7.36 (m, 2H), 6.98-6.94 (m, 2H), 6.88 (d, J=8.4, 1H), 6.50 (d, J=2.0, 1H), 3.65 (s, 2H);  $^{13}\text{C}$  NMR (75 MHz, DMSO- $d_6$ )  $\delta$  173.2, 163.5, 158.5, 154.4, 149.0, 146.5, 137.0, 131.1, 128.0, 117.8, 114.0, 113.4, 40.6

Isomer Z:  $^1\text{H}$  NMR (300 MHz, DMSO- $d_6$ )  $\delta$  12.35 (broad s, 1H), 11.00 (broad s, 1H), 7.69 (d, J=2.0, 1H), 7.62 (dd, J=8.3, J=2.0, 1H), 7.23-7.20 (m, 2H), 7.04-7.01 (m, 2H), 6.83 (d, J=8.3, 1H), 3.57 (s, 2H);  $^{13}\text{C}$  NMR (75 MHz, DMSO- $d_6$ )  $\delta$  172.5, 163.6, 159.0, 152.3, 147.2, 145.0, 136.6, 129.7, 125.5, 120.2, 117.8, 114.4, 113.3, 40.6

*(E,Z)-3-(3'-(trifluoromethyl)phenylimino)indolin-2-one (DSF-069).* Compound **DSF-069** was prepared by reacting compound **17** with 3-(trifluoromethyl)aniline under conventional heating. Yield 27%.

Ratio E/Z: 69:31; mp = 251-254 $^{\circ}$ C; IR (KBr):  $\tilde{\nu}$  ( $\text{cm}^{-1}$ ) = 3424 (NH), 1713 (C=O), 1330 (C-F); HRMS (ESI-TOF) for  $\text{C}_{15}\text{H}_{10}\text{F}_3\text{N}_2\text{O}$  (M+H) $^{+}$ : calcd = 291.0740, found = 291.0728

Isomer E:  $^1\text{H}$  NMR (300 MHz, DMSO- $d_6$ )  $\delta$  11.01 (broad s, 1H), 7.70 (t, J=7.2, 1H), 7.62-7.58 (m, 1H), 7.39-7.33 (m, 3H), 6.92 (d, J=7.2, 1H), 6.73 (td, J=7.6, J=1.0, 1H), 6.25 (dd, J=7.6, J=1.0, 1H);  $^{13}\text{C}$  NMR (75 MHz, DMSO- $d_6$ )  $\delta$  164.1, 156.8, 152.2, 148.2, 135.8, 131.8, 131.3, 126.1, 125.6, 122.7, 122.5, 122.2, 116.5, 115.1, 112.6

Isomer Z:  $^1\text{H}$  NMR (300 MHz, DMSO- $d_6$ )  $\delta$  10.88 (broad s, 1H), 7.62-7.58 (m, 2H), 7.47 (td, J=7.2, J=1.2, 1H), 7.44 (dd, J=7.2, J=1.2, 1H), 7.32 (s, 1H), 7.28 (dd, J=7.2, J=1.2, 1H), 7.07 (td, J=7.2, J=1.2, 1H), 6.88 (d, J=7.8, 1H);  $^{13}\text{C}$  NMR (75 MHz, DMSO- $d_6$ )  $\delta$  159.4, 155.0, 150.8, 147.0, 135.5, 130.3, 130.1, 124.0, 125.3, 124.0, 123.8, 123.3, 121.9, 121.4, 111.8

*(E,Z)-2-(4-(5,6-dioxane-2-oxoindoline-3-ylideneamino)phenyl)acetic acid (DSF-091).* Compound **DSF-091** was prepared by reacting compound **19** with 2-(4-aminophenyl)acetic acid under microwave irradiation. Yield 18%.

Ratio E/Z: >95:5; mp = 266-268°C; IR (KBr):  $\tilde{\nu}$  (cm<sup>-1</sup>) = 3434 (NH), 1719 (C=O), 1327 (C=N), 1165 (C-O); HRMS (ESI-TOF) for C<sub>18</sub>H<sub>15</sub>N<sub>2</sub>O<sub>5</sub> (M+H)<sup>+</sup>: calcd = 339.0975, found = 339.1000

Isomer E: <sup>1</sup>H NMR (300 MHz, DMSO-d<sub>6</sub>)  $\delta$  = 12.35 (broad s, 1H), 10.69 (broad s, 1H), 7.36-7.31 (m, 2H), 6.90-6.86 (m, 2H), 6.34 (s, 1H), 5.89 (s, 1H), 4.24-4.19 (m, 2H), 4.08-4.05 (m, 2H), 3.61 (s, 2H); <sup>13</sup>C NMR (75 MHz, DMSO-d<sub>6</sub>)  $\delta$  173.7, 164.9, 156.2, 150.2, 148.2, 147.0, 137.8, 132.4, 132.2, 117.0, 114.8, 113.5, 102.7, 65.8, 64.0, 40.3

Isomer Z was not characterized due the very low percentage in the mixture (less than 5%)

(*E,Z*)-2-(4-(6-chloro-5-fluoro-2-oxoindolin-3-ylideneamino)phenyl)acetic acid (**DSF-092**). Compound **DSF-092** was prepared by reacting compound **20** with 2-(4-aminophenyl)acetic acid under microwave irradiation. Yield 19%.

Ratio E/Z: 78:22; mp = 247-250°C; IR (KBr):  $\tilde{\nu}$  (cm<sup>-1</sup>) = 3319 (NH), 1718 (C=O), 1471 (C-F); HRMS (ESI-TOF) for C<sub>16</sub>H<sub>11</sub>ClFN<sub>2</sub>O<sub>3</sub> (M+H)<sup>+</sup>: calcd = 333.0437, found = 333.0444

Isomer E: <sup>1</sup>H NMR (300 MHz, DMSO-d<sub>6</sub>)  $\delta$  12.34 (broad s, 1H), 11.15 (broad s, 1H), 7.41-7.36 (m, 2H), 7.06 (d, J=6.1, 1H), 7.00-6.95 (m, 2H), 6.23 (d, J=8.9, 1H), 3.65 (s, 2H); <sup>13</sup>C NMR (75 MHz, DMSO-d<sub>6</sub>)  $\delta$  173.2, 163.8, 154.1, 152.5, 148.6, 144.4, 133.0, 131.2, 125.7, 117.8, 115.3, 113.4, 113.3, 40.6

Isomer Z: <sup>1</sup>H NMR (300 MHz, DMSO-d<sub>6</sub>)  $\delta$  12.34 (broad s, 1H), 11.02 (broad s, 1H), 7.65 (d, J=8.1, 1H), 7.24-7.20 (m, 2H), 7.05-7.02 (m, 2H), 7.01 (d, J=6.4, 1H), 3.65 (s, 2H); <sup>13</sup>C NMR (75 MHz, DMSO-d<sub>6</sub>)  $\delta$  173.2, 163.8, 158.2, 154.0, 148.6, 145.4, 134.5, 129.7, 126.2, 120.2, 115.4, 112.5, 111.4, 40.6

(*E,Z*)-2-(4-(5-methyl-2-oxoindolin-3-ylideneamino)phenyl)acetic acid (**DSF-093**). Compound **DSF-093** was prepared by reacting compound **21** with 2-(4-aminophenyl)acetic acid under conventional heating. Yield 52%.

Ratio E/Z: 85:15; mp = 231-232°C; IR (KBr):  $\tilde{\nu}$  (cm<sup>-1</sup>) = 3283 (NH), 1709 (C=O), 1220 (C=O); HRMS (ESI-TOF) for C<sub>17</sub>H<sub>15</sub>N<sub>2</sub>O<sub>3</sub> (M+H)<sup>+</sup>: calcd = 295.1077, found = 295.1054

Isomer E: <sup>1</sup>H NMR (300 MHz, DMSO-d<sub>6</sub>)  $\delta$  12.34 (broad s, 1H), 10.86 (broad s, 1H), 7.37-7.33 (m, 2H), 7.16 (dd, J=8.0, J=1.8, 1H), 6.93-6.88 (m, 2H), 6.78 (d, J=8.0, 1H), 6.14 (d, J=1.8, 1H), 3.64 (s, 2H), 1.94 (s, 3H); <sup>13</sup>C NMR (75 MHz, DMSO-d<sub>6</sub>)  $\delta$  173.3, 164.0, 155.8, 149.7, 145.1, 135.2, 132.3, 131.7, 131.1, 126.3, 122.0, 117.7, 111.7, 40.6, 20.9

Isomer Z: <sup>1</sup>H NMR (300 MHz, DMSO-d<sub>6</sub>)  $\delta$  12.34 (broad s, 1H), 10.76 (broad s, 1H), 7.41 (d, J=1.1, 1H), 7.25 (dd, J=7.9, J=1.1, 1H), 7.21-7.18 (m, 2H), 6.98-6.94 (m, 2H), 6.75 (d, J=7.9, 1H), 3.55 (s, 2H), 2.28 (s, 3H); <sup>13</sup>C NMR (75 MHz, DMSO-d<sub>6</sub>)  $\delta$  173.3, 159.1, 153.3, 147.8, 143.7, 134.9, 131.8, 130.9, 129.7, 123.5, 121.4, 119.8, 110.9, 40.6, 19.0

(*E,Z*)-2-(4-(5,7-dimethyl-2-oxoindolin-3-ylideneamino)phenyl)acetic acid (**DSF-094**). Compound **DSF-094** was prepared by reacting compound **22** with 2-(4-aminophenyl)acetic acid under conventional heating. Yield 26%.

Ratio E/Z: 84:16; mp = 240-242°C; IR (KBr):  $\tilde{\nu}$  (cm<sup>-1</sup>) = 3180 (NH), 1725 (C=O), 1617 (C=C), 1319 (C-N); HRMS (ESI-TOF) for C<sub>18</sub>H<sub>17</sub>N<sub>2</sub>O<sub>3</sub> (M+H)<sup>+</sup>: calcd = 309.1234, found = 309.1212

Isomer E: <sup>1</sup>H NMR (300 MHz, DMSO-d<sub>6</sub>)  $\delta$  10.89 (broad s, 1H), 7.36-7.32 (m, 2H), 7.00 (s, 1H), 6.90-6.86 (m, 2H), 5.99 (s, 1H), 3.62 (s, 2H), 2.14 (s, 3H), 1.91 (s, 3H); <sup>13</sup>C NMR (75 MHz, DMSO-d<sub>6</sub>)  $\delta$  173.5, 164.6, 156.1, 149.6, 143.7, 140.6, 136.5, 131.0, 130.9, 130.8, 123.7, 118.0, 117.6, 40.6, 20.2, 16.3

Isomer Z: <sup>1</sup>H NMR (300 MHz, DMSO-d<sub>6</sub>)  $\delta$  10.81 (broad s, 1H), 7.24 (s, 1H), 7.22-7.18 (m, 2H), 7.09 (s, 1H), 6.96-6.92 (m, 2H), 3.54 (s, 2H), 2.25 (s, 3H), 2.22 (s, 3H); <sup>13</sup>C NMR (75 MHz, DMSO-d<sub>6</sub>)  $\delta$  173.7, 160.5, 159.7, 147.5, 142.3, 136.5, 136.3, 131.8, 130.1, 129.7, 120.9, 119.8, 114.3, 40.7, 20.8, 16.0

(*E,Z*)-2-(4-(5-nitro-2-oxoindolin-3-ylideneamino)phenyl)acetic acid (**DSF-095**). Compound **DSF-095** was prepared by reacting compound **23** with 2-(4-aminophenyl)acetic acid under microwave irradiation. Yield 38%.

Ratio E/Z: 75:25; mp = 235-238°C; IR (KBr):  $\tilde{\nu}$  (cm<sup>-1</sup>) = 3225 (NH), 1735 (C=O), 1617 (C=C), 1343 (N=O); HRMS (ESI-TOF) for C<sub>16</sub>H<sub>12</sub>N<sub>3</sub>O<sub>5</sub> (M+H)<sup>+</sup>: calcd = 326.0771, found = 326.0785

Isomer E:  $^1\text{H}$  NMR (300 MHz, DMSO- $d_6$ )  $\delta$  8.27 (dd,  $J=8.7$ ,  $J=2.4$ , 1H), 7.44-7.40 (m, 2H), 7.36 (d,  $J=2.4$ , 1H), 7.09 (d,  $J=8.7$ , 1H), 7.05-7.01 (m, 2H), 3.66 (s, 2H);  $^{13}\text{C}$  NMR (75 MHz, DMSO- $d_6$ )  $\delta$  173.0, 164.3, 152.8, 151.2, 148.4, 142.0, 133.2, 131.1, 130.6, 128.7, 120.9, 118.1, 112.2, 40.6

Isomer Z:  $^1\text{H}$  NMR (300 MHz, DMSO- $d_6$ )  $\delta$  8.37 (dd,  $J=8.6$ ,  $J=2.4$ , 1H), 8.28 (d,  $J=2.4$ , 1H), 7.27-7.23 (m, 2H), 7.14-7.10 (m, 2H), 7.07 (d,  $J=8.6$ , 1H), 3.58 (s, 2H);  $^{13}\text{C}$  NMR (75 MHz, DMSO- $d_6$ )  $\delta$  173.1, 159.2, 153.6, 151.5, 146.8, 143.0, 133.0, 130.3, 129.8, 128.9, 120.6, 117.5, 111.5, 40.6

(*E,Z*)-2-(4-(5-methoxy-2-oxoindolin-3-ylideneamino)phenyl)acetic acid (**DSF-096**). Compound **DSF-096** was prepared by reacting compound **24** with 2-(4-aminophenyl)acetic acid under conventional heating. Yield 52%. Ratio E/Z: 86:14; mp = 223-225°C; IR (KBr):  $\tilde{\nu}$  ( $\text{cm}^{-1}$ ) = 3235 (NH), 1742 (C=O), 1484 (C=C), 1306 (C-N); HRMS (ESI-TOF) for  $\text{C}_{17}\text{H}_{15}\text{N}_2\text{O}_4$  ( $\text{M}+\text{H}$ ) $^+$ : calcd = 311.1026, found = 311.1038

Isomer E:  $^1\text{H}$  NMR (300 MHz, DMSO- $d_6$ )  $\delta$  12.34 (broad s, 1H), 10.78 (broad s, 1H), 7.38-7.34 (m, 2H), 6.98-6.90 (m, 3H), 6.81 (d,  $J=8.5$ , 1H), 5.91 (d,  $J=2.6$ , 1H), 3.62 (s, 2H), 3.39 (s, 3H);  $^{13}\text{C}$  NMR (75 MHz, DMSO- $d_6$ )  $\delta$  173.3, 164.1, 154.4, 149.5, 140.9, 132.4, 131.0, 127.0, 120.5, 116.5, 112.6, 111.5, 55.6, 40.9

Isomer Z:  $^1\text{H}$  NMR (300 MHz, DMSO- $d_6$ )  $\delta$  12.34 (broad s, 1H), 10.67 (broad s, 1H), 7.22-7.18 (m, 2H), 7.08 (d,  $J=2.6$ , 1H), 7.03 (dd,  $J=8.5$ ,  $J=2.6$ , 1H), 6.99-6.95 (m, 2H), 6.78 (d,  $J=8.5$ , 1H), 3.76 (s, 3H), 3.55 (s, 2H);  $^{13}\text{C}$  NMR (75 MHz, DMSO- $d_6$ )  $\delta$  173.3, 163.4, 154.4, 149.5, 139.7, 131.8, 130.5, 129.8, 123.8, 120.9, 120.8, 112.5, 111.9, 55.6, 40.9

(*E,Z*)-3-(3-(trifluoromethyl)benzylidene)-5-bromoindolin-2-one (**DSF-097**). Compound **DSF-097** was prepared by reacting compound **18** with 3-(trifluoromethyl)aniline under conventional heating. Yield 30%.

Ratio E/Z: 73:27; mp = 151-153°C; IR (KBr):  $\tilde{\nu}$  ( $\text{cm}^{-1}$ ) = 3433 (NH), 1732 (C=O), 1316 (C-F); HRMS (ESI-TOF) for  $\text{C}_{15}\text{H}_9\text{BrF}_3\text{N}_2\text{O}$  ( $\text{M}+\text{H}$ ) $^+$ : calcd = 368.9845, found = 368.9839

Isomer E:  $^1\text{H}$  NMR (300 MHz, DMSO- $d_6$ )  $\delta$  10.05 (broad s, 1H), 7.76-7.74 (m, 1H), 7.63-7.59 (m, 1H), 7.58 (dd,  $J=8.2$ ,  $J=2.1$ , 1H), 7.39-7.37 (m, 1H), 7.25-7.23 (m, 1H), 6.99 (d,  $J=8.2$ , 1H), 6.54 (d,  $J=2.1$ , 1H);  $^{13}\text{C}$  NMR (75 MHz, DMSO- $d_6$ )  $\delta$  162.9, 158.2, 151.6, 146.7, 137.4, 132.7, 131.4, 128.5, 125.6, 122.3, 121.5, 118.0, 115.2, 114.0, 113.2

Isomer Z:  $^1\text{H}$  NMR (300 MHz, DMSO- $d_6$ )  $\delta$  9.95 (broad s, 1H), 7.78 (d,  $J=2.1$ , 1H), 7.68 (dd,  $J=8.2$ ,  $J=2.1$ , 1H), 7.54 (dt,  $J=7.9$ ,  $J=0.7$ , 1H), 7.45 (dt,  $J=7.9$ ,  $J=0.7$ , 1H), 7.36-7.34 (m, 1H), 7.31-7.27 (m, 1H), 7.03 (d,  $J=8.2$ , 1H);  $^{13}\text{C}$  NMR (75 MHz, DMSO- $d_6$ )  $\delta$  164.2, 157.7, 150.3, 145.4, 137.1, 130.3, 130.3, 126.0, 125.8, 123.9, 121.4, 123.8, 117.9, 114.0, 113.8

(*E,Z*)-3-(3-(Trifluoromethyl)phenylimino)-5,6-dioxanoindolin-2-one (**DSF-098**). Compound **DSF-098** was prepared by reacting compound **19** with 3-(trifluoromethyl)aniline under microwave irradiation. Yield 15%.

Ratio E/Z: 69:31; mp = 279-281°C; IR (KBr):  $\tilde{\nu}$  ( $\text{cm}^{-1}$ ) = 3431 (NH), 1733 (C=O), 1322 (C-F); HRMS (ESI-TOF) for  $\text{C}_{17}\text{H}_{12}\text{F}_3\text{N}_2\text{O}_3$  ( $\text{M}+\text{H}$ ) $^+$ : calcd = 349.0795, found = 349.0801

Isomer E:  $^1\text{H}$  NMR (300 MHz, DMSO- $d_6$ )  $\delta$  10.24 (broad s, 1H), 7.74-7.72 (m, 1H), 7.63 (d,  $J=7.9$ , 1H), 7.41 (s, 1H), 7.37 (d,  $J=7.9$ , 1H), 6.23 (s, 1H), 5.89 (s, 1H), 4.22-4.20 (m, 2H), 4.08-4.06 (m, 2H);  $^{13}\text{C}$  NMR (75 MHz, DMSO- $d_6$ )  $\delta$  158.0, 150.2, 147.2, 146.6, 146.2, 137.8, 131.4, 130.9, 129.9, 124.5, 114.8, 114.7, 113.5, 112.5, 102.4, 65.8, 64.0

Isomer Z:  $^1\text{H}$  NMR (300 MHz, DMSO- $d_6$ )  $\delta$  10.15 (broad s, 1H), 7.54-7.52 (m, 1H), 7.44 (d,  $J=7.9$ , 1H), 7.33 (s, 1H), 7.28 (d,  $J=7.9$ , 1H), 6.25 (s, 1H), 5.72 (s, 1H), 4.72-4.70 (m, 2H), 4.25-4.23 (m, 2H);  $^{13}\text{C}$  NMR (75 MHz, DMSO- $d_6$ )  $\delta$  158.0, 149.3, 147.0, 146.2, 145.3, 136.3, 129.7, 124.6, 122.6, 122.1, 121.9, 121.5, 115.3, 112.9, 102.6, 66.8, 63.2

(*E,Z*)-3-(3-(trifluoromethyl)benzylidene)-6-chloro-5-fluoroindolin-2-one (**DSF-099**). Compound **DSF-099** was prepared by reacting compound **20** with 3-(trifluoromethyl)aniline under conventional heating. Yield 30%.

Ratio E/Z: 73:27; mp = 152-154°C; IR (KBr):  $\tilde{\nu}$  (cm<sup>-1</sup>) = 3178 (NH), 1741 (C=O), 1618 (C=N), 1473 (C=C), 1330 (C-F); HRMS (ESI-TOF) for C<sub>15</sub>H<sub>8</sub>ClF<sub>4</sub>N<sub>2</sub>O (M+H)<sup>+</sup>: calcd = 343.0256, found = 343.0251

Isomer E: <sup>1</sup>H NMR (300 MHz, DMSO-d<sub>6</sub>)  $\delta$  11.15 (broad s, 1H), 7.78-7.76 (t, J=7.7, 1H), 7.70 (d, J=7.7, 1H), 7.46 (s, 1H), 7.39 (d, J=7.7, 1H), 7.16 (d, J=6.1, 1H), 6.18 (d, J=8.9, 1H); <sup>13</sup>C NMR (75 MHz, DMSO-d<sub>6</sub>)  $\delta$  164.2, 155.2, 153.5, 148.6, 145.4, 131.6, 130.9, 126.7, 124.6, 122.4, 122.2, 116.3, 114.8, 113.3, 112.5

Isomer Z: <sup>1</sup>H NMR (300 MHz, DMSO-d<sub>6</sub>)  $\delta$  11.03 (broad s, 1H), 7.65 (d, J=8.1, 1H), 7.59-7.57 (t, J=8.2, 1H), 7.49 (d, J=8.2, 1H), 7.44 (s, 1H), 7.36 (d, J=8.2, 1H), 7.01 (d, J=6.4, 1H); <sup>13</sup>C NMR (75 MHz, DMSO-d<sub>6</sub>)  $\delta$  163.0, 158.2, 154.0, 148.6, 145.4, 130.8, 129.7, 126.2, 124.4, 123.0, 121.7, 116.3, 115.4, 112.5, 111.4

(*E,Z*)-3-(3-(trifluoromethyl)phenylimino)-5-methylindolin-2-one (**DSF-100**). Compound **DSF-100** was prepared by reacting compound **21** with 3-(trifluoromethyl)aniline under conventional. Yield 33%.

Ratio E/Z: 64:36; mp = 230-232°C; IR (KBr):  $\tilde{\nu}$  (cm<sup>-1</sup>) = 3268 (NH), 1739 (C=O), 1617 (C=N), 1333 (C-F); HRMS (ESI-TOF) for C<sub>16</sub>H<sub>12</sub>F<sub>3</sub>N<sub>2</sub>O (M+H)<sup>+</sup>: calcd = 305.0896, found = 305.0900

Isomer E: <sup>1</sup>H NMR (300 MHz, DMSO-d<sub>6</sub>)  $\delta$  10.91 (broad s, 1H), 7.71 (t, J=7.8, 1H), 7.63 (d, J=7.8, 1H), 7.39 (s, 1H), 7.26 (d, J=7.8, 1H), 7.19 (dd, J=8.0, J=1.0, 1H), 6.81 (d, J=8.0, 1H), 6.05 (d, J=1.0, 1H), 1.94 (s, 3H); <sup>13</sup>C NMR (75 MHz, DMSO-d<sub>6</sub>)  $\delta$  163.8, 156.6, 151.6, 145.6, 135.7, 131.9, 131.4, 131.2, 126.0, 124.5, 123.4, 121.9, 116.1, 114.9, 112.0, 20.2

Isomer Z: <sup>1</sup>H NMR (300 MHz, DMSO-d<sub>6</sub>)  $\delta$  10.79 (broad s, 1H), 7.53 (t, J=7.8, 1H), 7.42-7.40 (m, 1H), 7.34-7.30 (m, 2H), 7.27-7.25 (m, 2H), 6.77 (d, J=8.0, 1H), 2.29 (s, 3H); <sup>13</sup>C NMR (75 MHz, DMSO-d<sub>6</sub>)  $\delta$  159.2, 154.8, 150.5, 144.3, 135.5, 130.9, 130.8, 129.9, 124.7, 123.4, 122.7, 122.4, 121.6, 114.8, 111.2, 20.2

(*E,Z*)-3-(3-(trifluoromethyl)phenylimino)-5,7-dimethylindolin-2-one (**DSF-101**). Compound **DSF-101** was prepared by reacting compound **22** with 3-(trifluoromethyl)aniline under conventional heating. Yield 29%.

Ratio E/Z: 64:36; mp = 240-242°C; IR (KBr):  $\tilde{\nu}$  (cm<sup>-1</sup>) = 3432 (NH), 1725 (C=O), 1334 (C-F); HRMS (ESI-TOF) for C<sub>17</sub>H<sub>14</sub>F<sub>3</sub>N<sub>2</sub>O (M+H)<sup>+</sup>: calcd = 319.1053, found = 319.1061

Isomer E: <sup>1</sup>H NMR (300 MHz, DMSO-d<sub>6</sub>)  $\delta$  10.94 (broad s, 1H), 7.71 (t, J=7.9, 1H), 7.62 (d, J=7.9, 1H), 7.36 (s, 1H), 7.31 (d, J=7.9, 1H), 7.04 (s, 1H), 5.89 (s, 1H), 2.15 (s, 3H), 1.91 (s, 3H); <sup>13</sup>C NMR (75 MHz, DMSO-d<sub>6</sub>)  $\delta$  164.3, 156.9, 151.6, 144.2, 136.9, 131.8, 131.4, 129.2, 123.5, 122.7, 121.3, 115.8, 114.8, 20.7, 16.3

Isomer Z: <sup>1</sup>H NMR (300 MHz, DMSO-d<sub>6</sub>)  $\delta$  10.82 (broad s, 1H), 7.53 (t, J=7.9, 1H), 7.43 (d, J=7.9, 1H), 7.31 (d, J=7.9, 1H), 7.26 (s, 1H), 7.24 (s, 1H), 7.13 (s, 1H), 2.26 (s, 3H), 2.16 (s, 3H); <sup>13</sup>C NMR (75 MHz, DMSO-d<sub>6</sub>)  $\delta$  159.7, 155.2, 150.6, 142.9, 136.8, 130.9, 130.8, 130.0, 129.9, 123.8, 123.4, 121.7, 121.3, 120.5, 115.9, 20.7, 16.1

(*E,Z*)-3-(3-(trifluoromethyl)benzylidene)-5-nitroindolin-2-one (**DSF-102**). Compound **DSF-102** was prepared by reacting compound **23** with 3-(trifluoromethyl)aniline under microwave irradiation. Yield 27.8%.

Ratio E/Z: 65:35; mp = 250-252°C; IR (KBr):  $\tilde{\nu}$  (cm<sup>-1</sup>) = 3297 (NH), 1751 (C=O), 1618 (C=N), 1328 (C-F), 1164 (C-O), 1125 (N=O) cm<sup>-1</sup>; HRMS (ESI-TOF) for C<sub>15</sub>H<sub>9</sub>F<sub>3</sub>N<sub>3</sub>O<sub>3</sub> (M+H)<sup>+</sup>: calcd = 336.0591, found = 336.0579

Isomer E: <sup>1</sup>H NMR (300 MHz, DMSO-d<sub>6</sub>)  $\delta$  8.30 (dd, J=8.8, J=2.3, 1H), 7.78 (t, J=7.8, 1H), 7.72 (d, J=7.8, 1H), 7.48 (s, 1H), 7.39 (d, J=7.8, 1H), 7.12-7.07 (m, 2H); <sup>13</sup>C NMR (75 MHz, DMSO-d<sub>6</sub>)  $\delta$  165.4, 155.8, 150.9, 141.4, 139.7, 131.6, 131.0, 130.9, 124.6, 122.4, 122.0, 120.7, 114.8, 112.7

Isomer Z: <sup>1</sup>H NMR (300 MHz, DMSO-d<sub>6</sub>)  $\delta$  8.40 (dd, J=8.7, J=2.5, 1H), 8.27 (d, J=2.5, 1H), 7.58 (t, J=7.9, 1H), 7.51 (d, J=7.9, 1H), 7.48-7.46 (m, 1H), 7.36 (d, J=7.9, 1H), 7.10-7.06 (m, 1H); <sup>13</sup>C NMR (75 MHz, DMSO-d<sub>6</sub>)  $\delta$  160.6, 155.5, 149.7, 142.5, 137.5, 130.9, 130.8, 129.7, 124.6, 124.4, 123.0, 121.7, 118.3, 116.3, 111.9

(*E,Z*)-3-(3-(trifluoromethyl)phenylimino)-5-methoxyindolin-2-one (**DSF-103**). Compound **DSF-103** was prepared by reacting compound **24** with 3-(trifluoromethyl)aniline under conventional. Yield 58%.

Ratio *E/Z*: 66:34; mp = 236-239°C; IR (KBr):  $\tilde{\nu}$  (cm<sup>-1</sup>) = 3448 (NH), 1749 (C=O), 1629 (C=N), 1476 (C=C), 1339 (C-F), 1302 (C-N); HRMS (ESI-TOF) for C<sub>16</sub>H<sub>12</sub>F<sub>3</sub>N<sub>2</sub>O<sub>2</sub> (M+H)<sup>+</sup>: calcd = 321.0845, found = 321.0829

Isomer *E*: <sup>1</sup>H NMR (300 MHz, DMSO-*d*<sub>6</sub>)  $\delta$  10.82 (broad s, 1H), 7.73 (t, *J*=7.8, 1H), 7.63 (d, *J*=7.8, 1H), 7.41 (s, 1H), 7.33 (d, *J*=7.8, 1H), 6.99 (dd, *J*=8.5, *J*=2.6, 1H), 6.84 (d, *J*=8.5, 1H), 5.72 (d, *J*=2.6, 1H), 3.40 (s, 3H); <sup>13</sup>C NMR (75 MHz, DMSO-*d*<sub>6</sub>)  $\delta$  163.8, 154.4, 151.5, 141.3, 131.4, 130.8, 123.0, 124.5, 122.1, 120.6, 114.7, 112.8, 112.4, 108.3, 55.5

Isomer *Z*: <sup>1</sup>H NMR (300 MHz, DMSO-*d*<sub>6</sub>)  $\delta$  10.69 (broad s, 1H), 7.53 (t, *J*=7.9, 1H), 7.44 (d, *J*=7.9, 1H), 7.33 (s, 1H), 7.28 (d, *J*=7.9, 1H), 7.18 (d, *J*=2.6, 1H), 7.06 (dd, *J*=8.5, *J*=2.6, 1H), 6.81 (d, *J*=8.5, 1H), 3.77 (s, 3H); <sup>13</sup>C NMR (75 MHz, DMSO-*d*<sub>6</sub>)  $\delta$  159.2, 156.9, 150.3, 140.3, 129.9, 129.7, 124.6, 122.6, 122.1, 122.1, 121.9, 121.5, 115.9, 111.4, 56.2

## 2. Surface Plasmonic Resonance (SPR) experiments

**2.1. EGFR-EGF interaction:** SPR measurements were carried out at 25 °C on a dual flow-cell Biacore-X100 instrument (GE-Healthcare, Chicago IL). EGFR (SinoBiological, Beijing China) was immobilized (3360 RU) on a carboxymethylated-dextran chip (CM5), using the amide coupling chemistry at pH 4.0. Increasing concentrations of recombinant EGF (DiscoverX inc) were injected over the EGFR-coated sensor chip at a flow rate of 10  $\mu$ L/min, with a contact time of 180 sec, in 10 mM Hepes pH 7.4, 150 mM NaCl, 3 mM EDTA, 0.005% polyoxyethylene sorbitan

Each binding curve was subtracted for the corresponding baseline obtained on the reference flow cell and accounting for nonspecific binding, which was found <2% of RU<sub>max</sub>. The dissociation constant (*K<sub>d</sub>*) relative to the binding of the ligand (L), *i.e.* EGF, to the immobilized receptor (R), *i.e.* EGFR, was obtained as a fitting parameter by plotting the value of the response units at the steady state (RU<sub>eq</sub>), after reaching equilibrium at each ligand concentration (Figure S2), and fitting the data points with an equation describing the one-site binding model:

$$RU_{eq} = RU_{max} \cdot \frac{[L]_F}{[L]_F + K_d}$$

where RU<sub>max</sub> is the RU value at saturating L concentrations and [L]<sub>F</sub> is the concentration of the free ligand in equilibrium with the receptor-ligand (RL) complex present on the sensor chip surface. When [R] << *K<sub>d</sub>*, then [L]<sub>F</sub> can be approximated to [L]<sub>T</sub>, *i.e.* the total ligand concentration in the mobile phase. Data analysis was performed using the BIAevaluation software and OriginPro 2018b.

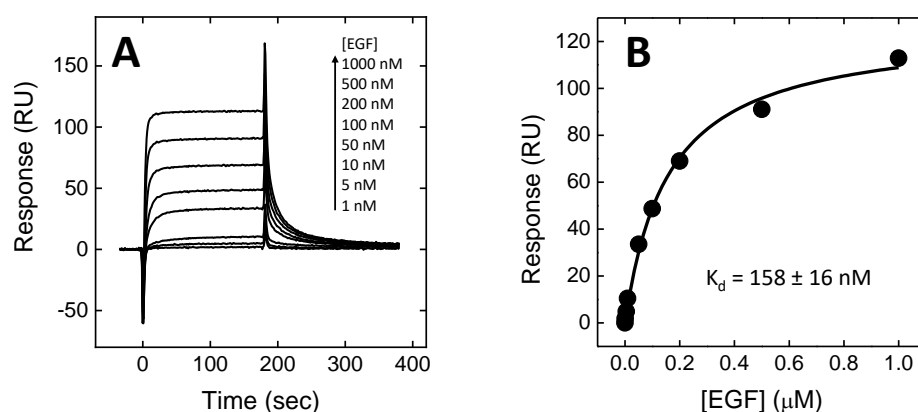

**Figure S1. Binding of EGF to EGFR monitored by surface plasmon resonance.** (A) Sensograms relative to EGF binding. (B) Plot of  $RU_{\max}$  versus EGF concentration. The fitting of data points with one-binding equation yields a  $K_d$  value of  $158 \pm 16$  nM.

**2.2. DSF-102 competition experiments:** Competition assays with **DSF-102** in solution were carried out by incubating a constant concentration of EGF (1  $\mu$ M) with increasing amounts of **DSF-102** up to 100  $\mu$ M for 30 min, followed by injection over the EGFR sensor chip. All measurements were carried out at a flow rate of 10  $\mu$ l/min, at 25°C using 10 mM Hepes pH 7.4, 150 mM NaCl, 3 mM EDTA, 0.005% polyoxyethylene sorbitan as running buffer. The SPR signal was taken at the end of the association phase and plotted against **DSF-102** concentration in order to visualize the effect of competition.



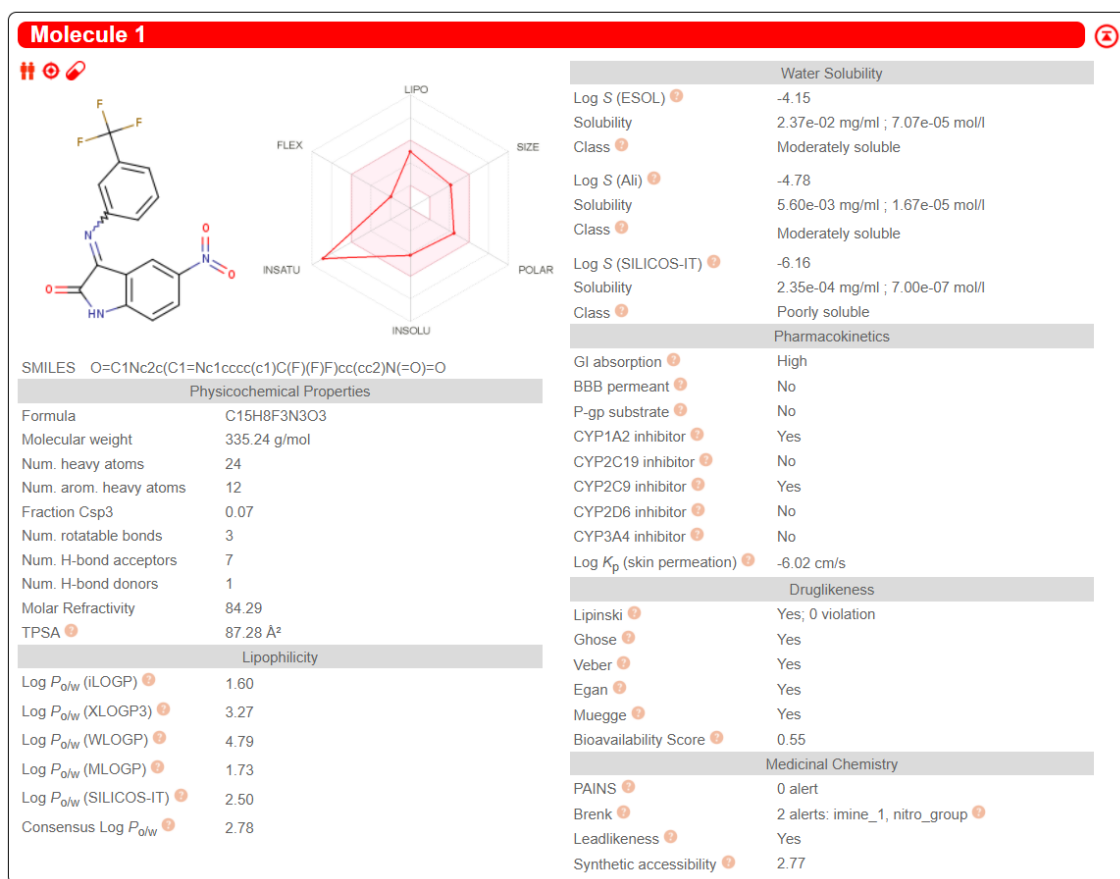

**Figure S2. Drug likeness properties of DSF-102.** Drug likeness properties have been computed using the SwissADME online tool <sup>5</sup>.

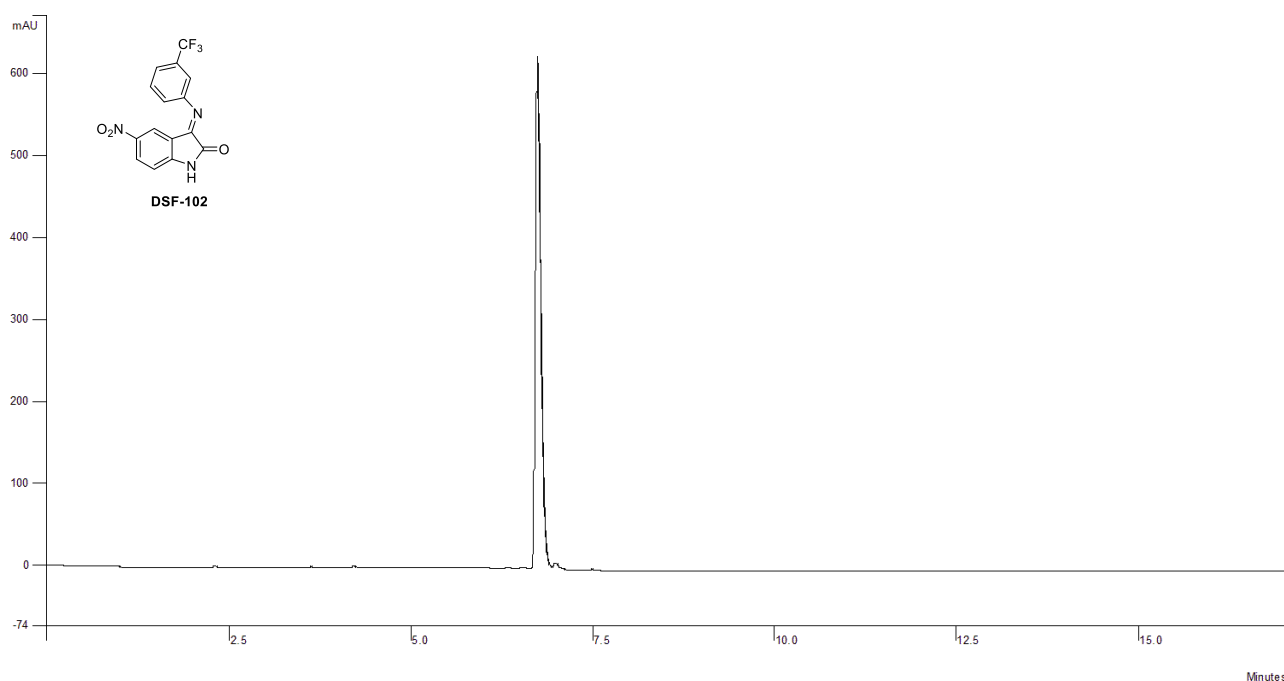

**Figure S3. HPLC analysis of DSF-102**

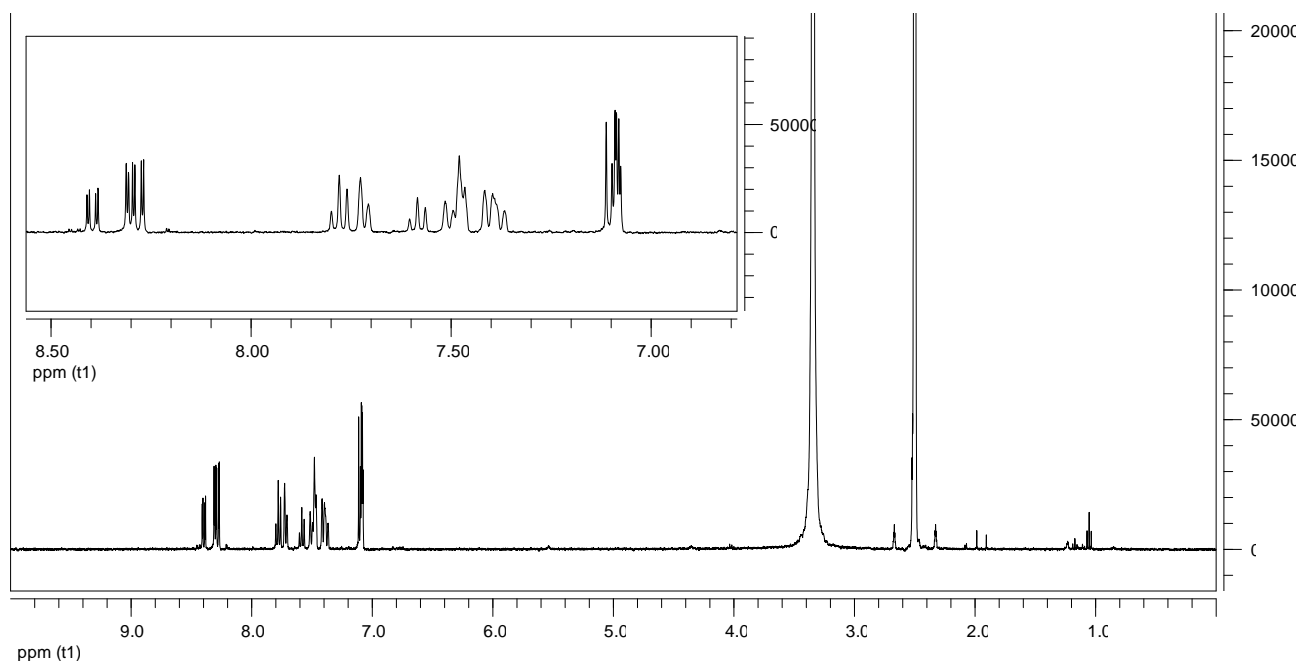

**Figure S4. <sup>1</sup>H-NMR of DSF-102**

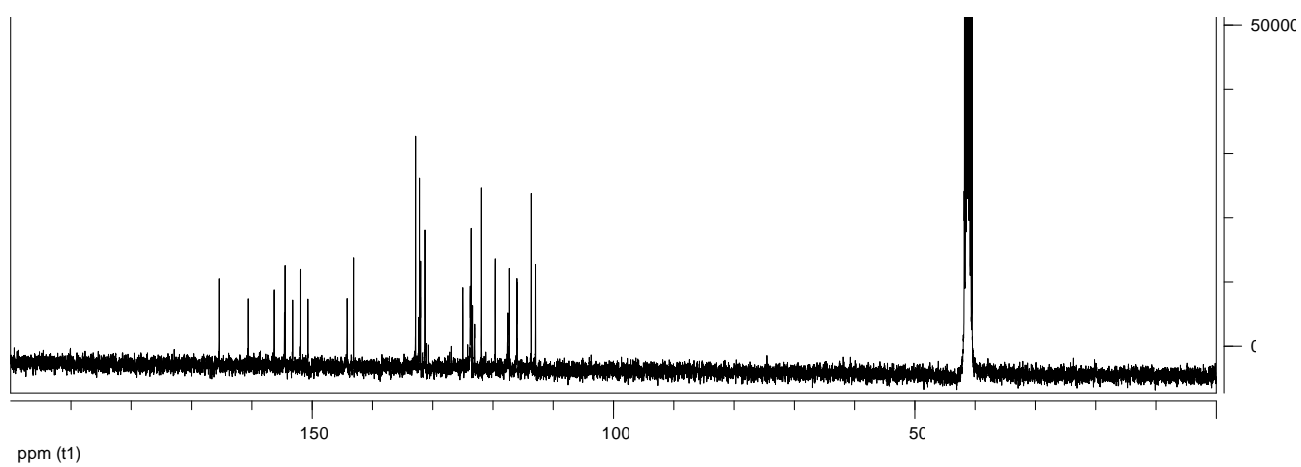

**Figure S5. <sup>13</sup>C-NMR of DSF-102**

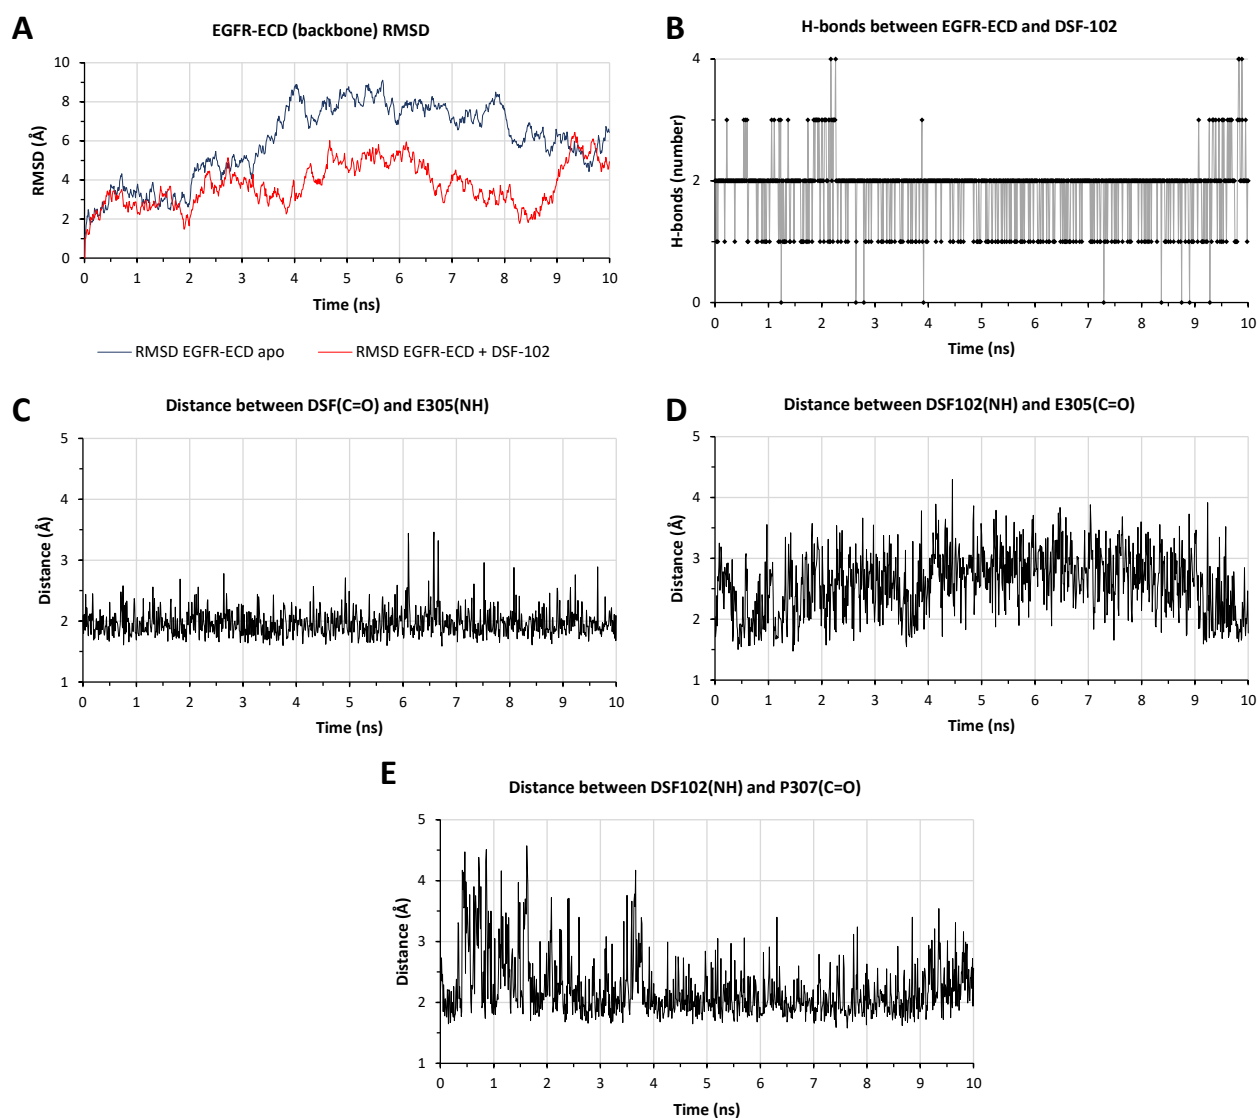

**Figure S6. Results from MD studies.** (A) RMSD (Å) of apo (blue line) and **DSF-102** bound (red line) EGFR-ECD during 10 ns of simulations. (B) Number of H-bonds formed between **DSF-102** and EGFR-ECD calculated through the hbond utility of Gromacs software. (C) Distance (Å) between **DSF-102** C=O and <sup>305</sup>Glu amide-NH. The distance was computed between the oxygen and the hydrogen atoms. (D) Distance (Å) between **DSF-102** NH and <sup>305</sup>Glu amide-C=O. The distance was computed between the hydrogen and the oxygen atoms. (E) Distance (Å) between **DSF-102** NH and <sup>307</sup>Pro amide-C=O. The distance was computed between the hydrogen and the oxygen atoms.

**Table S1. List of screened compounds, SMILES code and % of inhibition at 50 and 10  $\mu$ M (mean  $\pm$  SD of three independent experiments)**

| Compound | SMILES                                                                                                                                              | % inhibition @ | % inhibition @ |
|----------|-----------------------------------------------------------------------------------------------------------------------------------------------------|----------------|----------------|
|          |                                                                                                                                                     | 50 $\mu$ M     | 10 $\mu$ M     |
| DSF001   | <chem>NC1=CC2=CC3=C(C=C(N)C=C3)C=C2C=C1</chem>                                                                                                      | 0 $\pm$ 2      | 0 $\pm$ 2      |
| DSF002   | <chem>CC(C1=CC=CC2=C1C=C(C=CC=C3C(C)=O)C3=C2)=O</chem>                                                                                              | 0 $\pm$ 2      | 0 $\pm$ 3      |
| DSF003   | <chem>ClCC1=C2C(C=CC=C2)=C(CCl)C3=C1C=CC=C3</chem>                                                                                                  | 50 $\pm$ 1     | 35 $\pm$ 5     |
| DSF004   | <chem>N#CCC1=C2C(C=CC=C2)=C(CC#N)C3=C1C=CC=C3</chem>                                                                                                | 1 $\pm$ 1      | 0 $\pm$ 2      |
| DSF005   | <chem>O=C(C1=CC=CC2=C1C=C(C=CC=C3C(O)=O)C3=C2)O</chem>                                                                                              | 1 $\pm$ 4      | 0 $\pm$ 5      |
| DSF006   | <chem>C1(C=CC=C2)=C2C(CN3CCOCC3)=C4C=CC=CC4=C1CN5CCOCC5</chem>                                                                                      | 27 $\pm$ 4     | 19 $\pm$ 1     |
| DSF007   | <chem>C1(C=CC=C2)=C2C(CN3CCCCC3)=C4C=CC=CC4=C1CN5CCCCC5</chem>                                                                                      | 16 $\pm$ 4     | 16 $\pm$ 4     |
| DSF008   | <chem>O=C(C1=C2C=CC=C1)C3=C(C(NC(C)=O)=CC=C3O)C2=O</chem>                                                                                           | 14 $\pm$ 2     | 0 $\pm$ 5      |
| DSF009   | <chem>O=C(C1=C2C(NCCOCCN)=CC=C1NCCOCCN)C3=C(C=CC(C(NC4=CC=C(NS(=O)(C)=O)C=C4)=O)=C3)C2=O</chem>                                                     | 48 $\pm$ 1     | 8 $\pm$ 1      |
| DSF010   | <chem>O=C(C1=C2C(NCCN3CCNCC3)=CC=C1NCCN4CCNCC4)C5=C(C=C(C(C(NC6=CC=C(NS(=O)(C)=O)C=C6)=O)=C5)C2=O</chem>                                            | 34 $\pm$ 2     | 28 $\pm$ 3     |
| DSF011   | <chem>O=C(C1=C2C=CC=C1O)C3=C(C=C(COC(COCC(O)=O)=O)C=C3O)C2=O</chem>                                                                                 | 39 $\pm$ 1     | 9 $\pm$ 5      |
| DSF012   | <chem>O=C(C1=C2C=CC=C1)C3=C(C(NCCCCCOC(C(C)NC(C(C(C)C)NC(OCC4=CC=CC=C4)=O)=O)=O)=CC=C3NCCCCCOC(C(C)NC(C(C(C)C)NC(OCC5=CC=CC=C5)=O)=O)=O)C2=O</chem> | 20 $\pm$ 5     | 0 $\pm$ 1      |
| DSF013   | <chem>O=C(C1=C2C=CC=C1)C3=C(C(NCCCCCO)=CC=C3NCCCCCOC(C(C)NC(C(C(C)C)NC(OCC4=CC=CC=C4)=O)=O)=O)C2=O</chem>                                           | 0 $\pm$ 2      | 0 $\pm$ 5      |
| DSF014   | <chem>O=C(C1=C2C=CC=C1OCC=C)C3=C(C(OCC=C)=CC=C3)C2=O</chem>                                                                                         | 0 $\pm$ 1      | 0 $\pm$ 3      |
| DSF015   | <chem>O=C(C1=C2C=CC=C1)C3=C(C(F)=CC=C3NCCN(C)C)C2=O</chem>                                                                                          | 48 $\pm$ 1     | 39 $\pm$ 4     |
| DSF016   | <chem>O=C(C1=C2C=CC=C1)C3=C(C(F)=CC=C3NCCNCCO)C2=O</chem>                                                                                           | 25 $\pm$ 3     | 33 $\pm$ 5     |
| DSF017   | <chem>O=C(C1=C2C=CC=C1)C3=C(C(NC(CN4CCCCC4)=O)=CC=C3NC(CN5CCCCC5)=O)C2=O</chem>                                                                     | 14 $\pm$ 1     | 9 $\pm$ 2      |
| DSF018   | <chem>O=C(C1=C2C=CC=C1)C3=C(C(NC(CN4CCOCC4)=O)=CC=C3NC(CN5CCOCC5)=O)C2=O</chem>                                                                     | 38 $\pm$ 5     | 16 $\pm$ 3     |
| DSF019   | <chem>O=C(C1=C2C(O)=CC=C1O)C3=C(C(NC(CN4CCCCC4)=O)=CC=C3NC(CN5CCCCC5)=O)C2=O</chem>                                                                 | 33 $\pm$ 1     | 35 $\pm$ 5     |
| DSF020   | <chem>O=C(C1=C2C(O)=CC=C1O)C3=C(C(NC(CN4CCOCC4)=O)=CC=C3NC(CN5CCOCC5)=O)C2=O</chem>                                                                 | 29 $\pm$ 1     | 33 $\pm$ 5     |
| DSF021   | <chem>O=C(C1=C2C=CC=C1)C3=C(C(NC(CCN4CCOCC4)=O)=CC=C3NC(CN5CCOCC5)=O)C2=O</chem>                                                                    | 30 $\pm$ 5     | 16 $\pm$ 4     |
| DSF022   | <chem>NC1=CC=CC(C2=NC=NC(C3=CC=CC=C3)=C2)=C1</chem>                                                                                                 | 4 $\pm$ 4      | 0 $\pm$ 2      |
| DSF023   | <chem>NC1=CC=CC(C2=NC=NC(C3=CC=C(C(O)=O)C=C3)=C2)=C1</chem>                                                                                         | 8 $\pm$ 2      | 22 $\pm$ 1     |
| DSF024   | <chem>OC1=NC(C2=CC=C(C(O)=O)C=C2)=CC(C3=CC(C(F)(F)F)=CC=C3)=N1</chem>                                                                               | 5 $\pm$ 3      | 16 $\pm$ 1     |
| DSF025   | <chem>FC(C1=CC=CC(C2=NC=NC(C3=CC=C(C(O)=O)C=C3)=C2)=C1)(F)F</chem>                                                                                  | 34 $\pm$ 1     | 6 $\pm$ 5      |
| DSF026   | <chem>FC(C1=CC=CC(C2=NC=NC(C3=CC=CC=C3)=C2)=C1)(F)F</chem>                                                                                          | 0 $\pm$ 1      | 0 $\pm$ 5      |
| DSF027   | <chem>C1(C2=CC=CC=C2)=CC(C3=CC(C4=CC=CC=C4)=CC=C3)=NC=N1</chem>                                                                                     | 0 $\pm$ 1      | 0 $\pm$ 2      |
| DSF028   | <chem>BrC1=CC=CC(C2=NC=NC(C3=CC=CC=C3)=C2)=C1</chem>                                                                                                | 0 $\pm$ 1      | 0 $\pm$ 4      |
| DSF029   | <chem>OC1=CC(C2=CC=CC=C2)=CC=C1C3=CC=C(C(O)=O)C=C3</chem>                                                                                           | 0 $\pm$ 3      | 1 $\pm$ 4      |
| DSF030   | <chem>OC1=CC(C2=CC=CC=C2)=CC=C1C3=CC=C(C(NCC4=CC=CC=C4)=O)C=C3</chem>                                                                               | 0 $\pm$ 1      | 0 $\pm$ 5      |
| DSF031   | <chem>O=C1OC2=C(C=CC(NC3=CC=CC(OC)=C3)=N2)C=C1C4=CC=CS4</chem>                                                                                      | 19 $\pm$ 1     | 0 $\pm$ 1      |
| DSF032   | <chem>O=C1OC2=C(C=CC(NC3=CC=CC(SC)=C3)=N2)C=C1C4=CC=CS4</chem>                                                                                      | 3 $\pm$ 5      | 0 $\pm$ 3      |

|        |                                                                                        |            |            |
|--------|----------------------------------------------------------------------------------------|------------|------------|
| DSF033 | <chem>O=C1OC2=C(C(N(C)C)=NC(NC3=CC=CC(OC)=C3)=N2)C=C1C4=C(Cl)C=CC=C4Cl</chem>          | $12 \pm 3$ | $0 \pm 2$  |
| DSF034 | <chem>O=C1OC2=C(C(O)=NC(NC3=CC=CC(OC)=C3)=N2)C=C1C4=C(Cl)C=CC=C4Cl</chem>              | $0 \pm 1$  | $14 \pm 2$ |
| DSF035 | <chem>O=C1OC2=C(C(O)=NC(NC3=CC=CC(OC)=C3)=N2)C=C1C4=CC(OC)=CC(OC)=C4</chem>            | $0 \pm 2$  | $0 \pm 5$  |
| DSF036 | <chem>O=C1OC2=C(C(O)=NC(NC3=CC=CC(OC)=C3)=N2)C=C1C4=CC=CC=C4</chem>                    | $0 \pm 5$  | $0 \pm 3$  |
| DSF037 | <chem>O=C1OC2=C(C(NC3=CC=CC(C4=CC=CC=C4)=C3)=NC=N2)C=C1C5=C(Cl)C=CC=C5Cl</chem>        | $40 \pm 5$ | $12 \pm 4$ |
| DSF038 | <chem>O=C1OC2=C(C(NC3=CC=CC(C)=C3)=NC=N2)C=C1C4=C(Cl)C=CC=C4Cl</chem>                  | $24 \pm 5$ | $0 \pm 1$  |
| DSF039 | <chem>O=C1OC2=C(C(N3CCN(C)CC3)=NC=N2)C=C1C4=C(Cl)C=CC=C4Cl</chem>                      | $10 \pm 2$ | $0 \pm 2$  |
| DSF040 | <chem>O=C1OC2=NC(O)=NC=C2C=C1C(OC)=O</chem>                                            | $0 \pm 5$  | $0 \pm 1$  |
| DSF041 | <chem>O=C1OC2=NC(NC3=CC=CC(C4=CC=CC=C4)=C3)=NC(O)=C2C=C1C5=CC=CC(Br)=C5</chem>         | $0 \pm 4$  | $0 \pm 1$  |
| DSF042 | <chem>OC1=CC=C2C(OC(C(CC(OC)=O)=C2C)=O)=C1</chem>                                      | $0 \pm 2$  | $0 \pm 4$  |
| DSF043 | <chem>O=C1OC2=CC(OC)=CC=C2C(C)=C1CC(NC3=CC=C(C(O)=O)C=C3)=O</chem>                     | $0 \pm 2$  | $0 \pm 2$  |
| DSF044 | <chem>O=C1OC2=C(C)C(OC)=CC=C2C(C)=C1CCC(NC3=CC=C(C(O)=O)C=C3)=O</chem>                 | $0 \pm 1$  | $0 \pm 2$  |
| DSF045 | <chem>O=C1OC2=CC(OC)=CC=C2C(C)=C1CCC(NC3=CC=C(C(O)=O)C=C3)=O</chem>                    | $0 \pm 5$  | $0 \pm 3$  |
| DSF046 | <chem>O=C1OC2=CC(OCCOC)=CC=C2C(C)=C1CC(NC3=CC=C(C(O)=O)C=C3)=O</chem>                  | $0 \pm 1$  | $0 \pm 2$  |
| DSF047 | <chem>O=C1OC2=C(C)C(OC)=CC=C2C(C)=C1CC(NC3=CC=CC(C(O)=O)=C3)=O</chem>                  | $0 \pm 1$  | $0 \pm 4$  |
| DSF048 | <chem>O=C1OC2=CC(OCCOC)=CC=C2C(C)=C1CCC(NC3=CC=C(C(O)=O)C=C3)=O</chem>                 | $3 \pm 4$  | $9 \pm 3$  |
| DSF049 | <chem>O=C1OC2=NC3=C(C(CCCC4)=C4O3)C=C2C(C)=C1CCC(NC5=CC(C(O)=O)=CC=C5)=O</chem>        | $36 \pm 3$ | $35 \pm 2$ |
| DSF050 | <chem>O=C1OC2=C(C)C3=C(C(CCCC4)=C4O3)C=C2C(C)=C1CC(NC5=CC=C(C(O)=C5)=O</chem>          | $32 \pm 2$ | $24 \pm 4$ |
| DSF051 | <chem>O=C1OC2=C(C)C3=C(C(CCCC4)=C4O3)C=C2C(C)=C1CC(NC5=CC=C(NS(=O)(C)=O)C=C5)=O</chem> | $50 \pm 1$ | $40 \pm 1$ |
| DSF052 | <chem>O=C1OC2=C(C)C3=C(C(CCCC4)=C4O3)C=C2C(C)=C1CC(NC5=CC=C(NC(C)=O)C=C5)=O</chem>     | $49 \pm 2$ | $41 \pm 4$ |
| DSF053 | <chem>O=C1OC2=C(C)C3=C(C(CCCC4)=C4O3)C=C2C(C)=C1CC(NC5=CC=C(C(N)=O)C=C5)=O</chem>      | $43 \pm 1$ | $39 \pm 5$ |
| DSF054 | <chem>O=C1OC2=C(O)C3=C(C(CCCC4)=C4O3)C=C2C(C)=C1C</chem>                               | $46 \pm 4$ | $8 \pm 4$  |
| DSF055 | <chem>CC1=C(C)OC2=C1C=C3C(OC(C(CC(NCC4=CC=CC=C4Cl)=O)=C3C)=O)=C2C</chem>               | $46 \pm 5$ | $46 \pm 1$ |
| DSF056 | <chem>O=C(NC1=CC=C(C)C=C1)NC(C=C2)=CC=C2NC3=NC=NC(C4=CC=C(C=C4)=C3</chem>              | $22 \pm 5$ | $0 \pm 1$  |
| DSF057 | <chem>O=C(NC1=CC=C(C(O)=O)C=C1)NC(C=C2)=CC=C2NC3=NC=NC(C4=CC=CC=C4)=C3</chem>          | $44 \pm 5$ | $17 \pm 2$ |
| DSF058 | <chem>OC1=NC(NC2=CC(OC)=CC=C2)=NC=C1C(O)=O</chem>                                      | $5 \pm 5$  | $12 \pm 2$ |
| DSF059 | <chem>CC1=CC=C([N+])([O-])C=C1NC2=NC=CC(C3=CN=CC=C3)=N2</chem>                         | $0 \pm 5$  | $0 \pm 5$  |
| DSF060 | <chem>C1C1=NC(C)=NC(NC2=NC=C(C(O)=O)S2)=C1</chem>                                      | $0 \pm 2$  | $0 \pm 1$  |
| DSF061 | <chem>ClC1=CN=C(OC2=CC=CC(NC(NC(C3=CC=CC=C3)=O)=O)=C2)N=C1</chem>                      | $1 \pm 1$  | $20 \pm 4$ |
| DSF062 | <chem>ClC1=CN=C(OC2=CC=CC(NC(NC(C3=CC=CC=C3)=O)=S)=C2)N=C1</chem>                      | $21 \pm 2$ | $9 \pm 3$  |

|        |                                                                                |        |        |
|--------|--------------------------------------------------------------------------------|--------|--------|
| DSF063 | <chem>ClC1=CN=C(OC2=CC=CC(NC(NC(C3=CC=CC=C3[N+])([O-])=O)=O)=O)=C2)N=C1</chem> | 5 ± 5  | 0 ± 4  |
| DSF064 | <chem>O=C(C1=CC=CC=C1)NC(NC2=CC(OC3=NC=C(CC)C=N3)=CC=C2)=O</chem>              | 0 ± 2  | 0 ± 5  |
| DSF065 | <chem>O=C(C1=CC=CC=C1)NC(NC2=CC(OC3=NC=C(CC)C=N3)=CC=C2)=S</chem>              | 22 ± 5 | 0 ± 5  |
| DSF066 | <chem>O=C(C1=CC=CC=C1[N+])([O-])=O)NC(NC2=CC(OC3=NC=C(CC)C=N3)=CC=C2)=O</chem> | 0 ± 4  | 0 ± 4  |
| DSF067 | <chem>O=C1NC2=CC=CC=C2/C1=N\C3=CC=C(CC(O)=O)C=C3</chem>                        | 42 ± 1 | 42 ± 5 |
| DSF068 | <chem>O=C1NC2=CC=C(Br)C=C2/C1=N\C3=CC=C(CC(O)=O)C=C3</chem>                    | 56 ± 4 | 37 ± 5 |
| DSF069 | <chem>O=C1NC2=CC=CC=C2/C1=N\C3=CC(C(F)(F)F)=CC=C3</chem>                       | 56 ± 2 | 27 ± 5 |
| DSF070 | <chem>O=C1NC2=CC=C(Br)C=C2/C1=N\C3=C(OC)C=CC(OC)=C3</chem>                     | 41 ± 1 | 20 ± 5 |
| DSF071 | <chem>O=C1OC(C2=CC(C(O)=O)=CC=C2)=N/C1=C/C3=CC=C(NC(C)=O)C=C3</chem>           | 0 ± 5  | 0 ± 3  |
| DSF072 | <chem>O=C1OC(C2=CC=CC=C2)=N/C1=C/C3=CC(OC)=C(OC(C)=O)C=C3</chem>               | 39 ± 2 | 16 ± 4 |
| DSF073 | <chem>O=C1OC(C2=CC=CC=C2)=N/C1=C/C3=CC=C(N(C)C)C=C3</chem>                     | 36 ± 3 | 23 ± 1 |
| DSF074 | <chem>O=C1OC(C2=CC=CC=C2)=N/C1=C/C3=CC=C(C=CC=C4)C4=C3</chem>                  | 48 ± 2 | 10 ± 3 |
| DSF075 | <chem>O=C1OC(C2=CC=CC=C2)=N/C1=C/C3=CC=CN3</chem>                              | 34 ± 4 | 18 ± 5 |
| DSF076 | <chem>O=C1OC(C2=CC=CC=C2)=N/C1=C/C3=CC=C(OC)C=C3</chem>                        | 18 ± 4 | 25 ± 2 |
| DSF077 | <chem>O=C1OC(C2=CC=CC=C2)=N/C1=C/C3=CC=C(C(C)=O)C4=C3C=CC=C4</chem>            | 39 ± 1 | 7 ± 1  |
| DSF078 | <chem>O=C1OC(C2=CC=CC=C2)=N/C1=C/C3=CC=C(NC(C)=O)C=C3</chem>                   | 37 ± 4 | 7 ± 1  |
| DSF079 | <chem>O=C1OC(C2=CC(OC)=CC=C2[N+])([O-])=O)N/C1=C/C3=CC=C(NC(C)=O)C=C3</chem>   | 41 ± 2 | 3 ± 1  |
| DSF080 | <chem>O=C1OC(C2=CC=C([N+])([O-])=O)C=C2O)N/C1=C/C3=CC=C(NC(C)=O)C=C3</chem>    | 28 ± 3 | 11 ± 5 |
| DSF081 | <chem>O=S(C1=CC=C(CC(O)=O)C=C1)(NC2=CC=CC=C2)=O</chem>                         | 26 ± 1 | 21 ± 5 |
| DSF082 | <chem>CC(C=CC=C1C)=C1NS(C2=CC=C(CC(O)=O)C=C2)(=O)=O</chem>                     | 19 ± 5 | 16 ± 1 |
| DSF083 | <chem>CC(C=CC=C1C)=C1NS(C2=CC=C(CC(O)=O)C=C2)(=O)=O</chem>                     | 49 ± 3 | 36 ± 4 |
| DSF084 | <chem>ClC1=CC([N+])([O-])=O)C(S(NC2=CC=C(C(O)=O)C=C2)(=O)=O)C=C1</chem>        | 29 ± 3 | 19 ± 2 |
| DSF085 | <chem>ClC1=CC([N+])([O-])=O)C(S(NC2=CC=C(C(O)=O)C(O)=C2)(=O)=O)C=C1</chem>     | 36 ± 5 | 0 ± 4  |
| DSF086 | <chem>ClC1=CC([N+])([O-])=O)C(S(NC2=CC=CC(Cl)=C2)(=O)=O)C=C1</chem>            | 19 ± 4 | 0 ± 3  |
| DSF087 | <chem>ClC1=CC([N+])([O-])=O)C(S(NC2=CC=C(C(OC)=O)C=C2)(=O)=O)C=C1</chem>       | 36 ± 4 | 2 ± 3  |
| DSF088 | <chem>ClC1=CC([N+])([O-])=O)C(S(NC2=CC(OC)=CC=C2OC)(=O)=O)C=C1</chem>          | 22 ± 3 | 0 ± 3  |
| DSF089 | <chem>ClC1=CC([N+])([O-])=O)C(S(N2CCOCC2)(=O)=O)C=C1</chem>                    | 22 ± 4 | 20 ± 5 |
| DSF090 | <chem>ClC1=CC([N+])([O-])=O)C(S(N2CCCCC2)(=O)=O)C=C1</chem>                    | 19 ± 1 | 12 ± 2 |

## Supplementary Bibliography

- [22] Zaryanova, E. V.; Lozinskaya, N. A.; Beznos, O. V.; Volkova, M. S.; Chesnokova, N. B.; Zefirov, N. S. Oxindole-based intraocular pressure reducing agents. *Bioorg Med Chem Lett* **2017**, 27 (16), 3787-3793. DOI: 10.1016/j.bmcl.2017.06.065.
- [47] Palluotto, F.; Campagna, F.; Carotti, A.; Ferappi, M.; Rosato, A.; Vitali, C. Synthesis and antibacterial activity of pyridazino[4,3-b]indole-4-carboxylic acids carrying different substituents at N-2. *Farmaco* **2002**, 57, 63-69. DOI: 10.1016/s0014-827x(01)01173-9.
- [48] Jin, K.; Zhang, X.; Ma, C.; Xu, Y.; Yuan, Y.; Xu, W. Novel indoline-2,3-dione derivatives as inhibitors of aminopeptidase N (APN). *Bioorg Med Chem* **2013**, 21 (9), 2663-2670. DOI: 10.1016/j.bmc.2012.06.024.
- [50] Daina, A.; Michielin, O.; Zoete, V. SwissADME: a free web tool to evaluate pharmacokinetics, drug-likeness and medicinal chemistry friendliness of small molecules. *Sci Rep* **2017**, 7, 42717. DOI: 10.1038/srep42717.
- [62] Acquasaliente, L.; Peterle, D.; Tescari, S.; Pozzi, N.; Pengo, V.; De Filippis, V. Molecular mapping of  $\alpha$ -thrombin ( $\alpha$ T)/ $\beta$ 2-glycoprotein I ( $\beta$ 2GpI) interaction reveals how  $\beta$ 2GpI affects  $\alpha$ T functions. *Biochem J* **2016**, 473 (24), 4629-4650. DOI: 10.1042/BCJ20160603.
